# Supplementary material
Source: PubMed Central journal article supplement (PMC8576894)
Supplement: 12966_2021_1218_MOESM2_ESM.pdf [file 12966_2021_1218_MOESM2_ESM.pdf]

# Supplementary material

## Appendix A

### Pre-specified sensitivity analyses relating to objective 1 (effectiveness in low SES groups)

Low SES subgroup analysis comparing apps with a sole PA focus versus those without

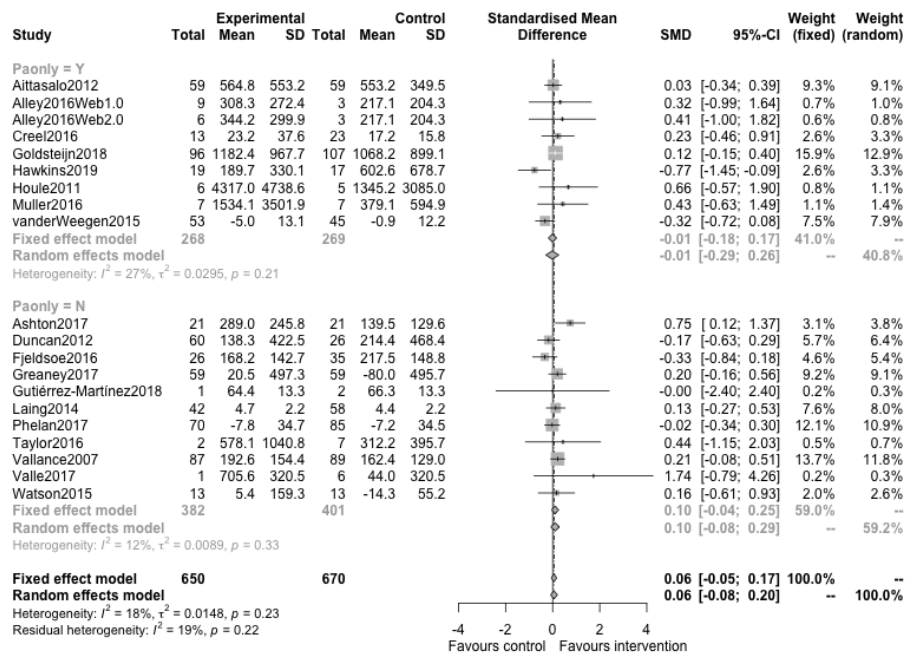

Figure 1: Low SES participants in studies split by whether the app had a sole PA focus or not

## Low SES subgroup analysis comparing between countries

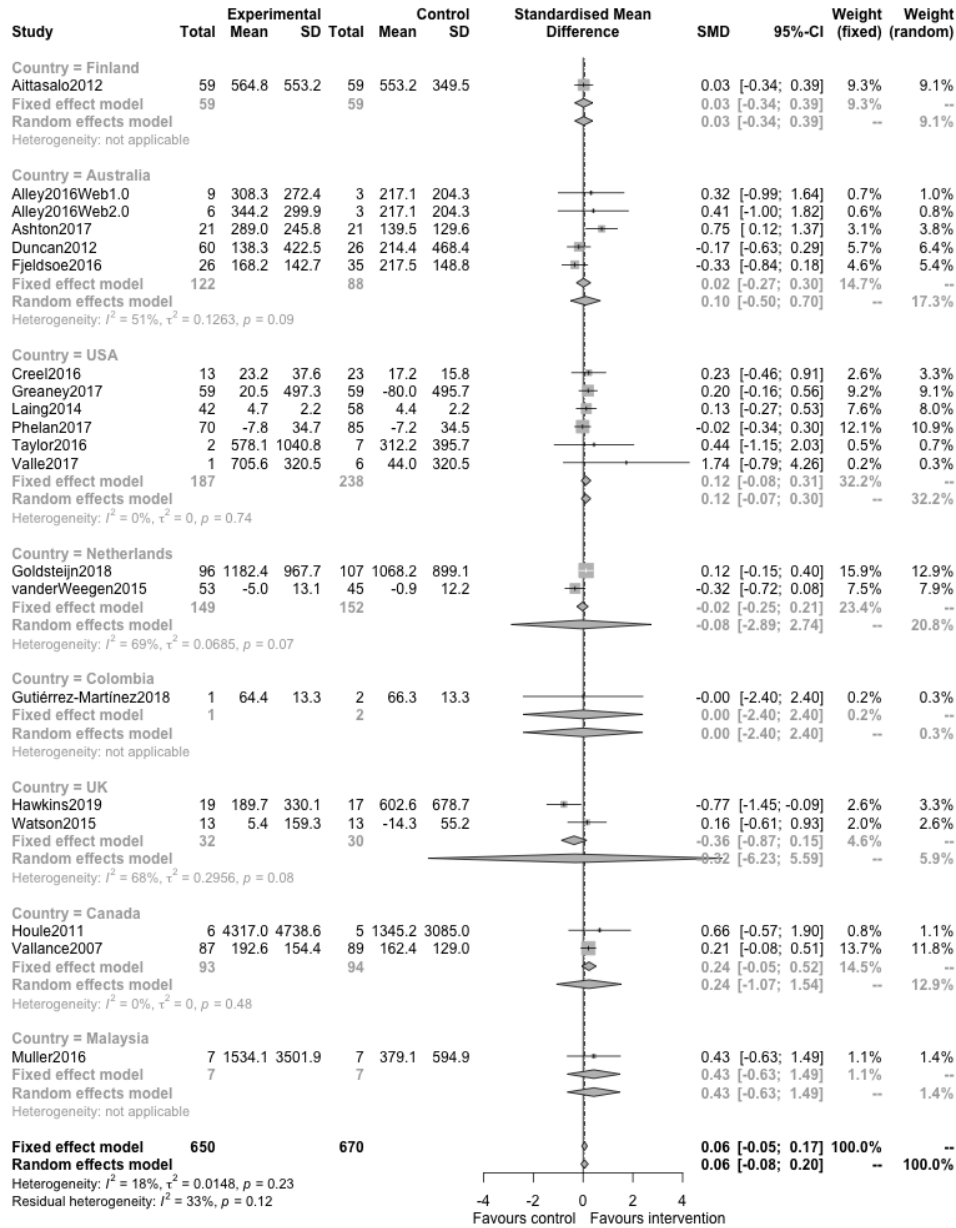

Figure 2: Low SES participants in studies split by country

### **Low SES subgroup analysis by outcome**

There were too few studies for each outcome type to subgroup meaningfully.

# Low SES subgroup analysis by high risk of bias

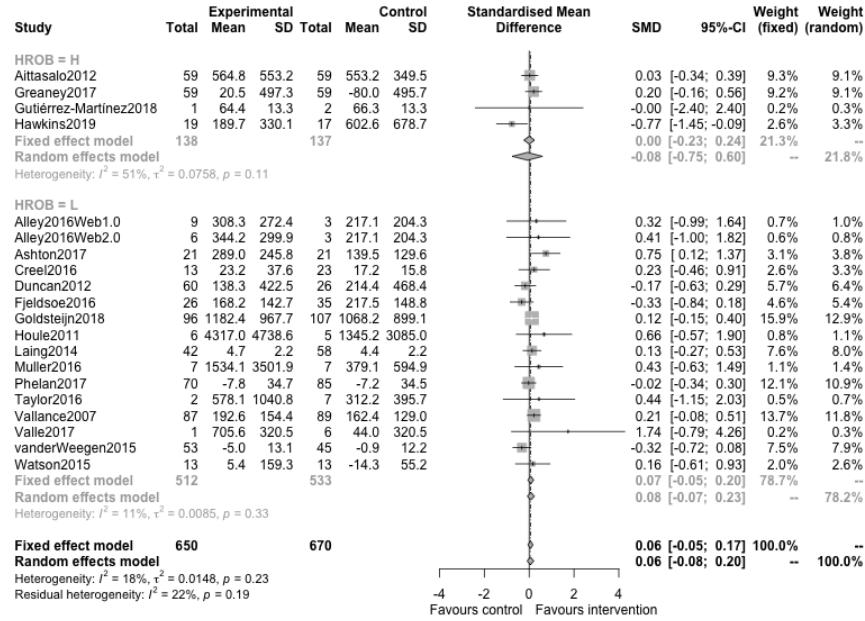

Figure 3: Low SES participants in studies split by whether the studies were at high risk of bias or not

## Low SES subgroup analysis by age groups

Age group categorisation and reporting did not allow combining into groups for sub-group analysis.

## Low SES subgroup analysis by healthy or general population/versus chronic disease populations

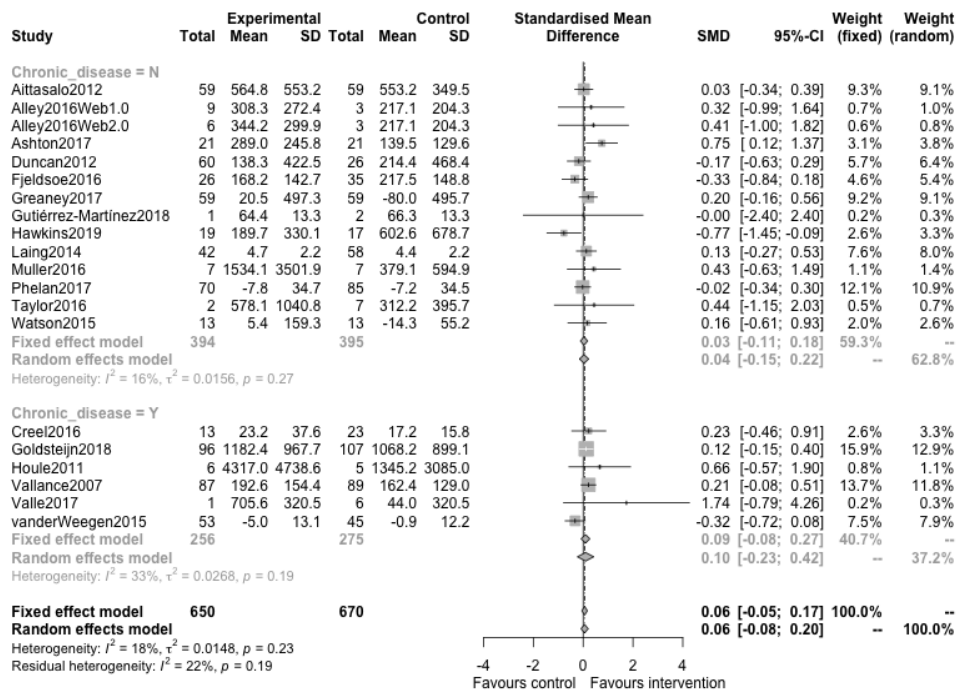

Figure 4: Low SES participants in studies split by whether the study populations were suffering from chronic disease or not

Low SES subgroup analysis by duration of app exposure (less than 3 months, 3-6, more than 6 months)

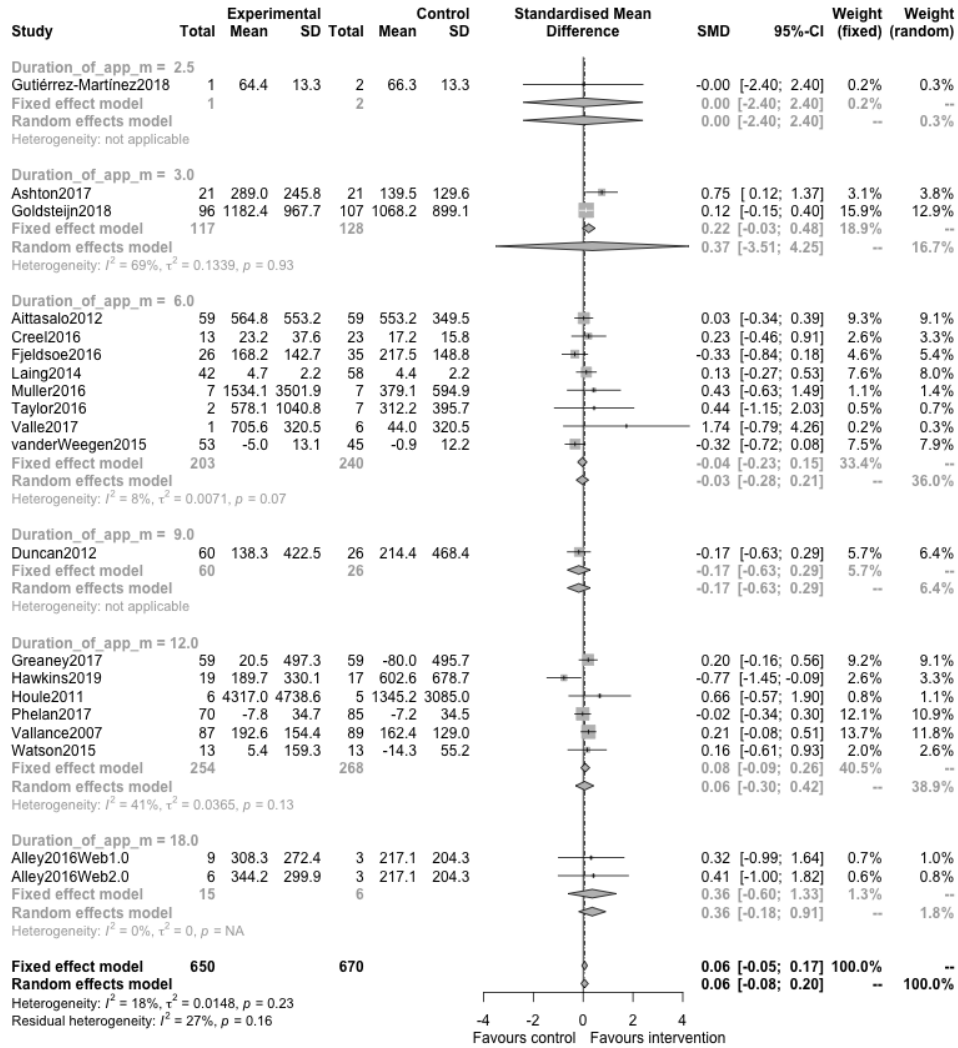

Figure 5: Low SES participants in studies split by duration of app exposure

## Low SES subgroup analysis by duration of follow-up

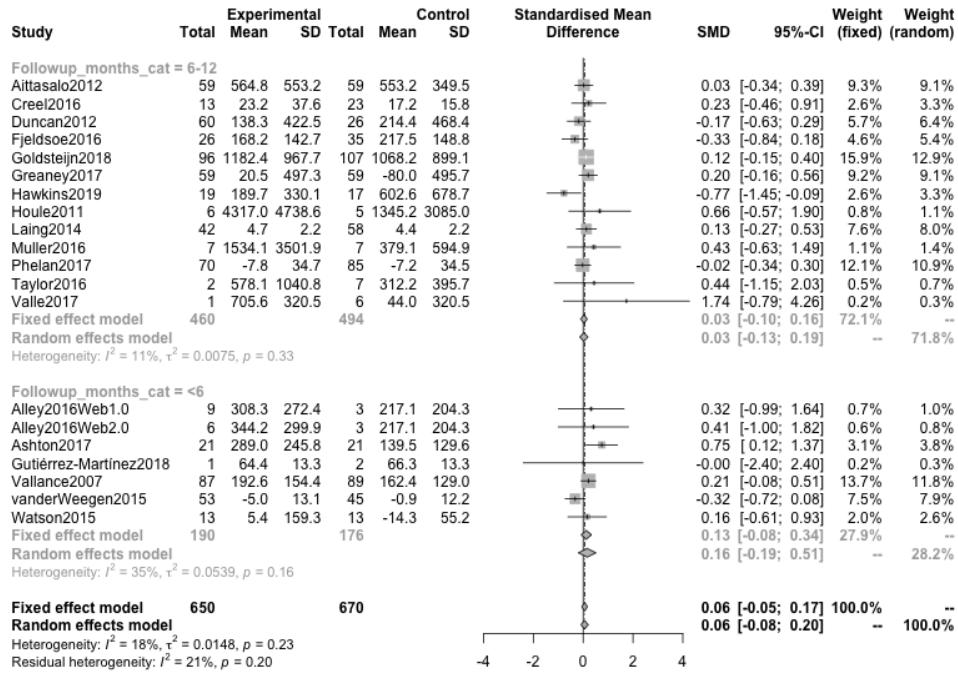

Figure 6: Low SES participants in studies split by length of follow-up

## Low SES subgroup analysis by pregnancy

Not performed due to lack of studies.

## Low SES Behaviour change subgroups

### Low SES- Goals and planning versus not

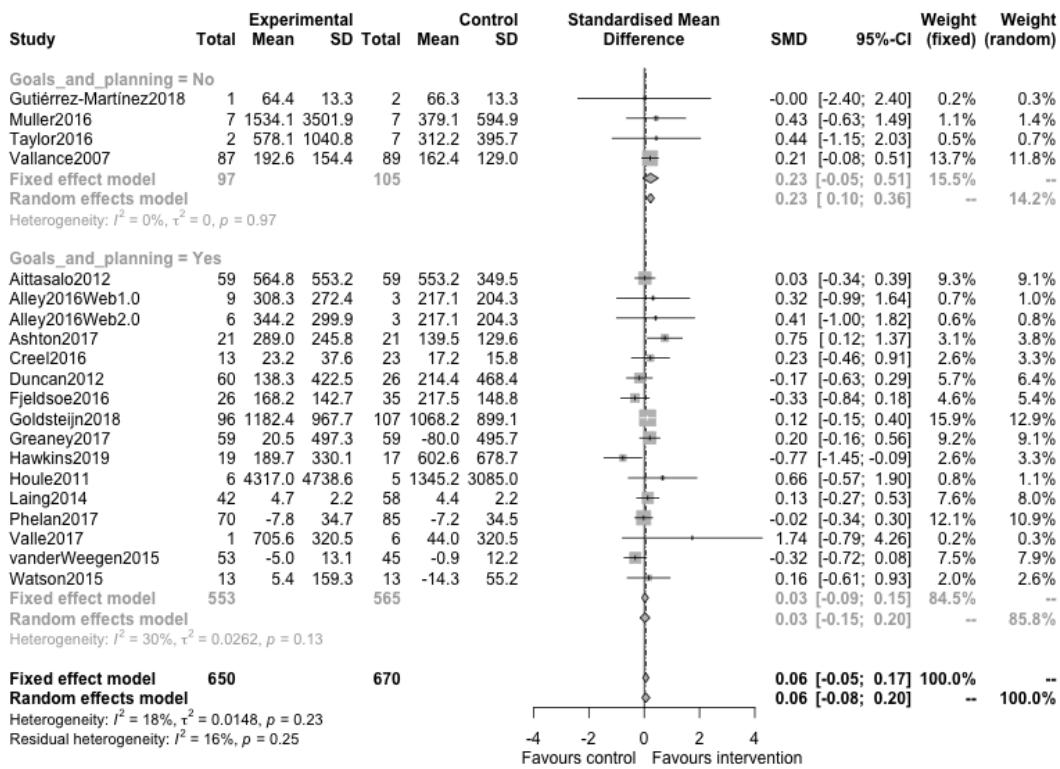

Figure 7: Low SES participants in studies split by whether they employed goals and planning as a behaviour change technique or not



# Low SES- Feedback and monitoring versus not

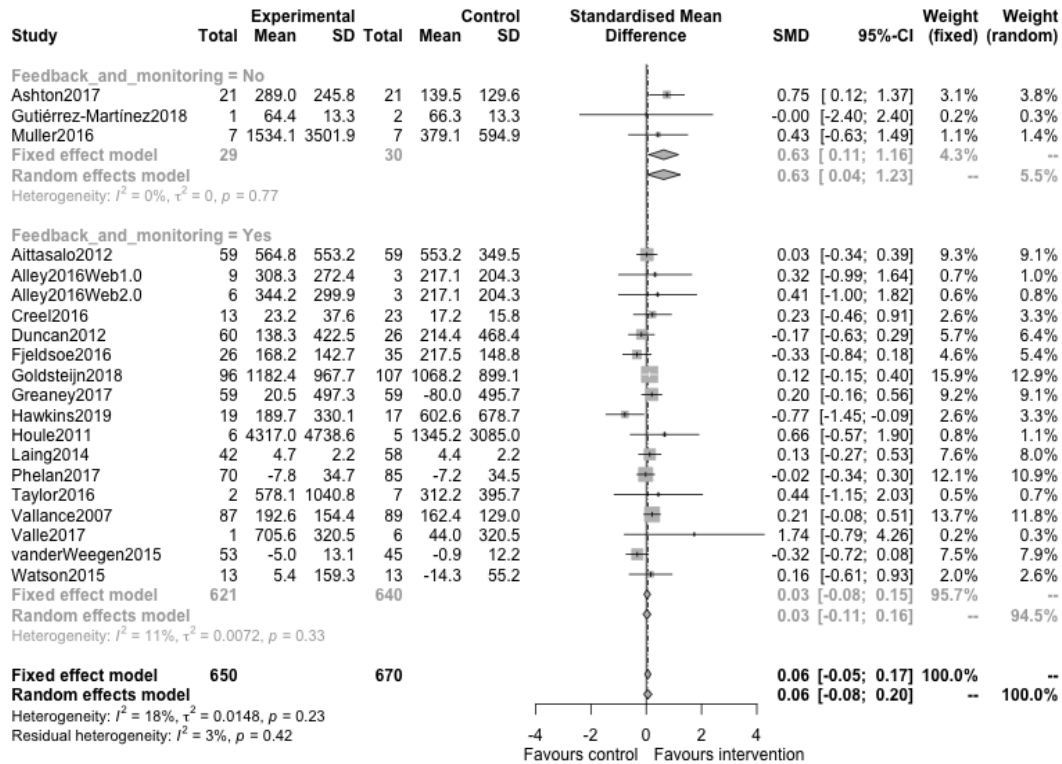

Figure 8: Low SES participants in studies split by whether they employed feedback and monitoring as a behaviour change technique or not

Low SES- Sharing knowledge versus not

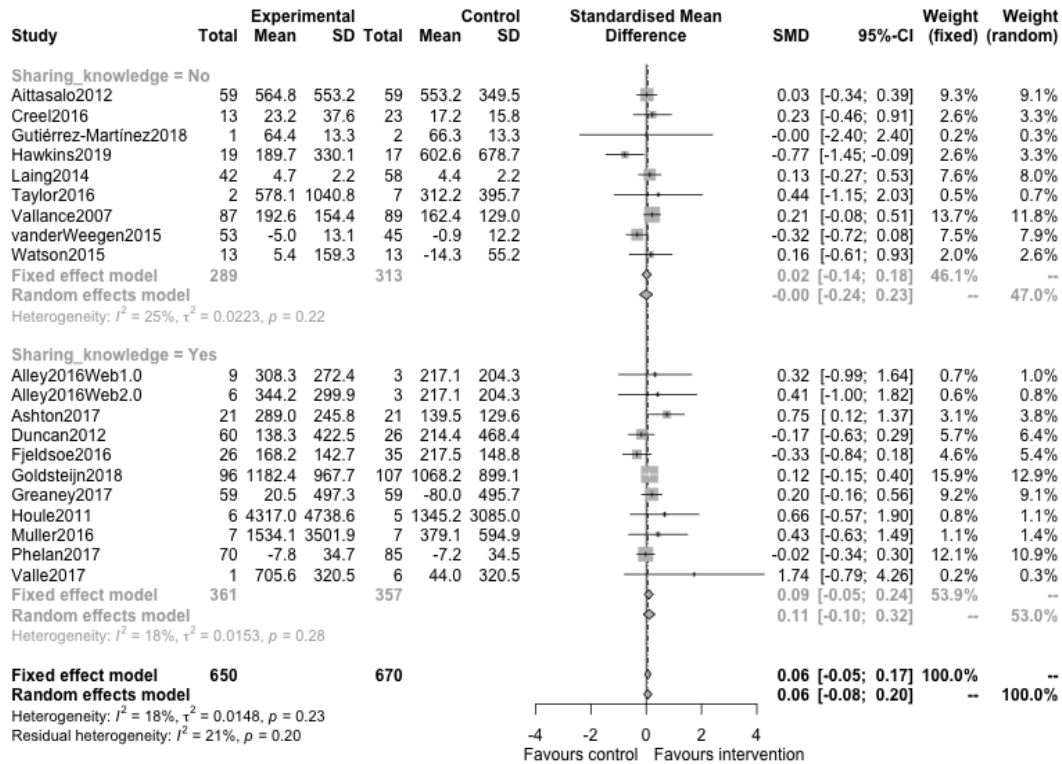

Figure 9: Low SES participants in studies split by whether they employed sharing knowledge as a behaviour change technique or not

Low SES- Natural consequences versus not

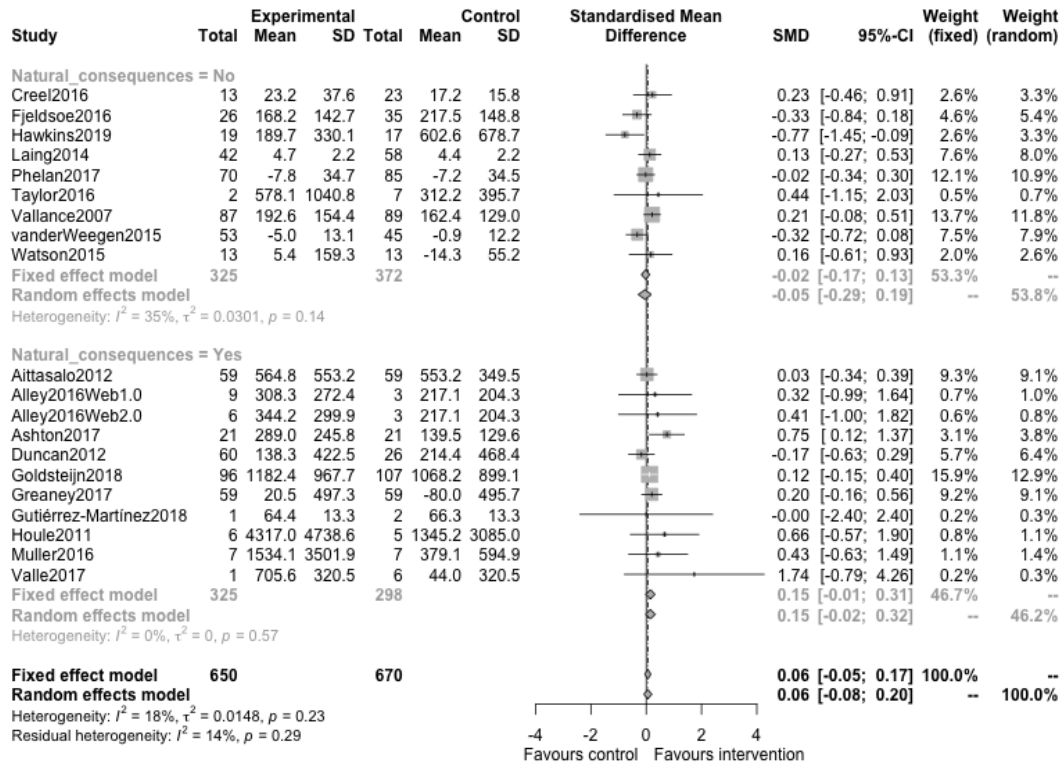

Figure 10: Low SES participants in studies split by whether they employed natural consequences as a behaviour change technique or not

## Low SES- Comparison of behaviour versus not

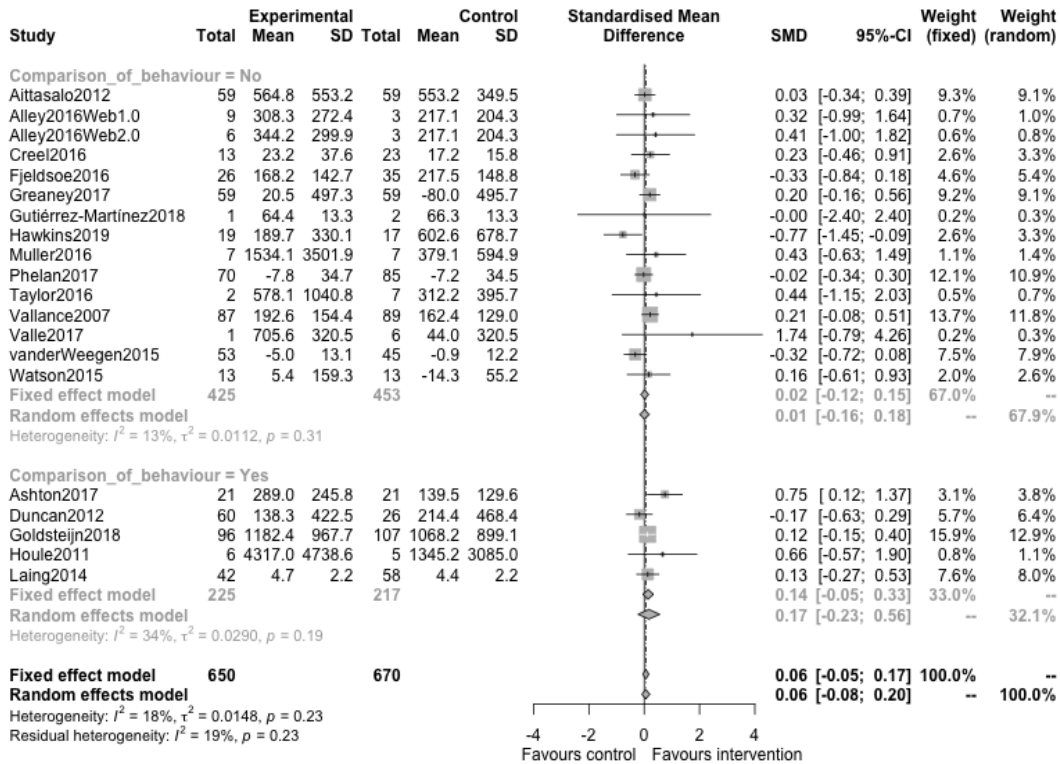

Figure 11: Low SES participants in studies split by whether they employed comparison of behaviour as a behaviour change technique or not

Low SES- Reward and threat versus not

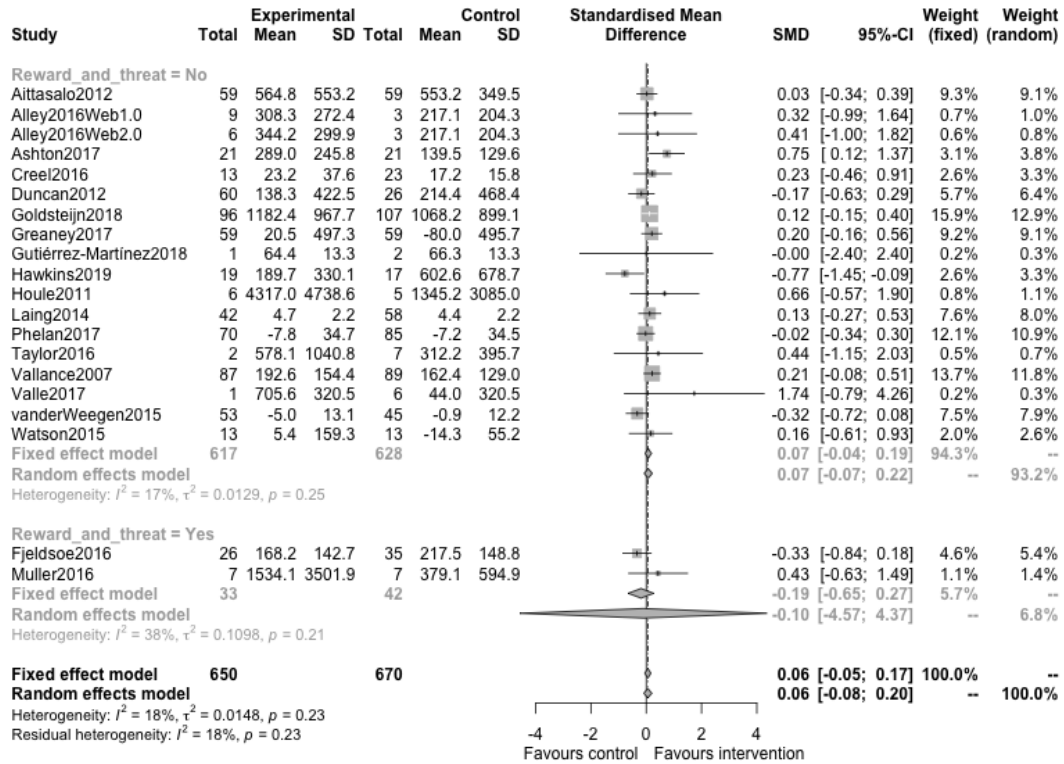

Figure 12: Low SES participants in studies split by whether they employed reward and threat as a behaviour change technique or not

## Low SES- Antecedents versus not

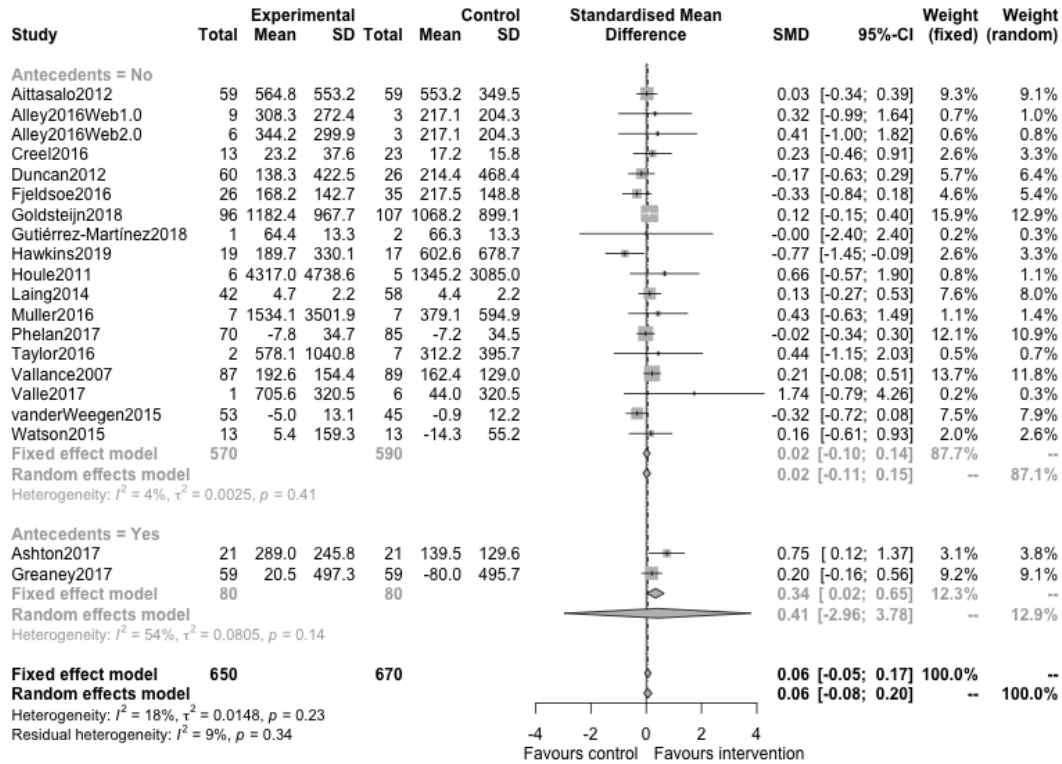

Figure 13: Low SES participants in studies split by whether they employed antecedents as a behaviour change technique or not

## Appendix B

### Exploration of publication bias in studies of low SES participants

There is no evidence of publication case ( $p$ -value = 0.52).

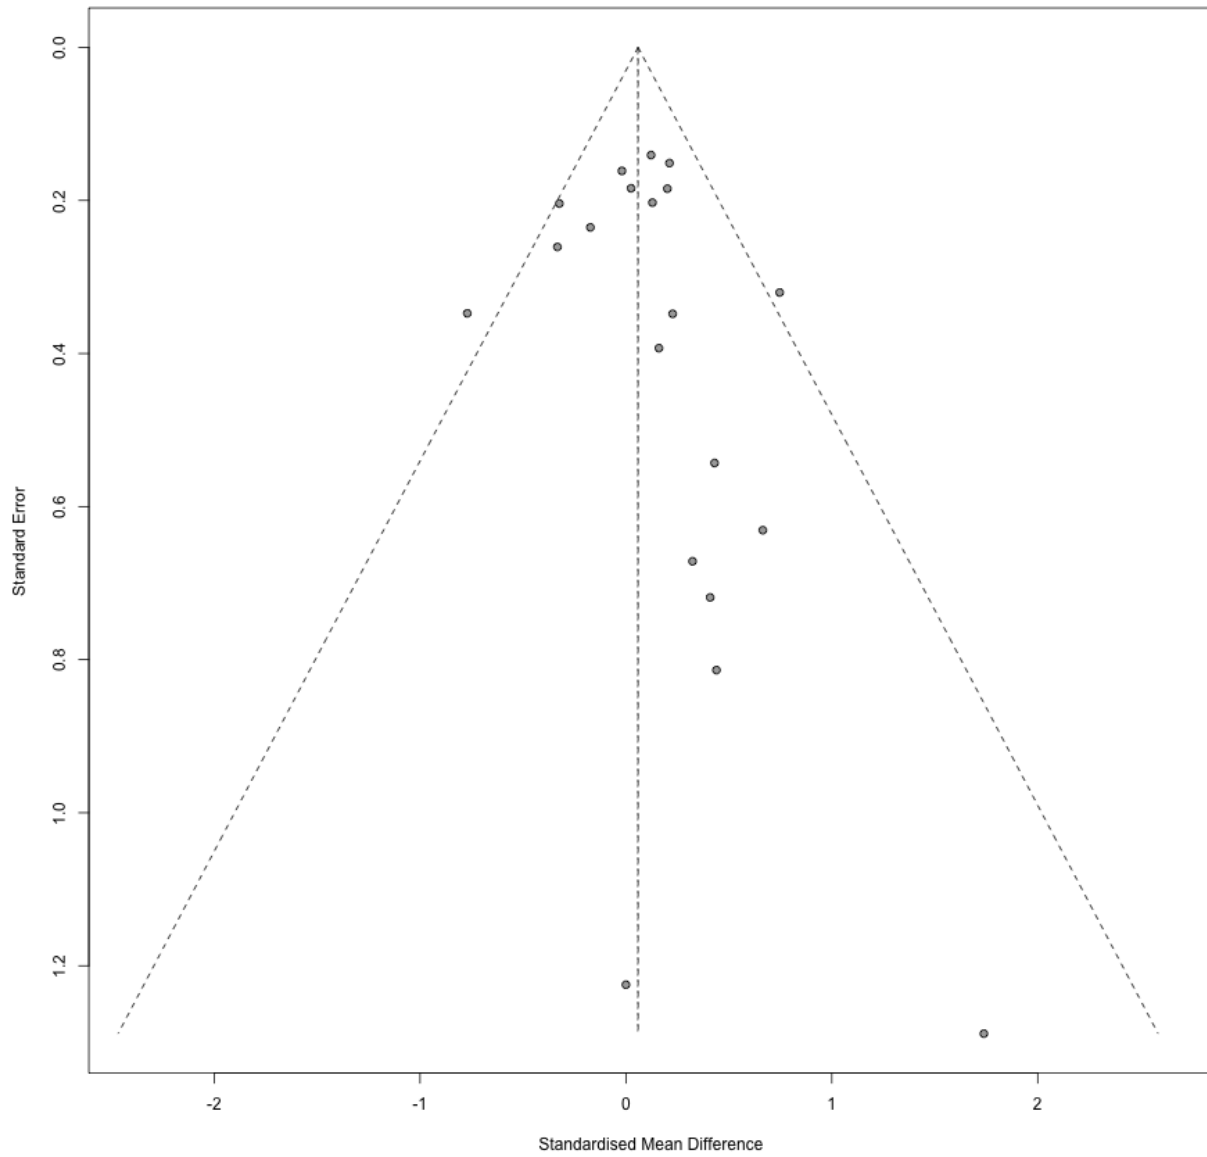

Figure 14: Funnel plot for low SES studies

# Appendix C

## Pre-specified sensitivity analyses relating to objective 2 (effectiveness in high SES groups)

High SES subgroup analysis comparing apps with a sole PA focus versus those without

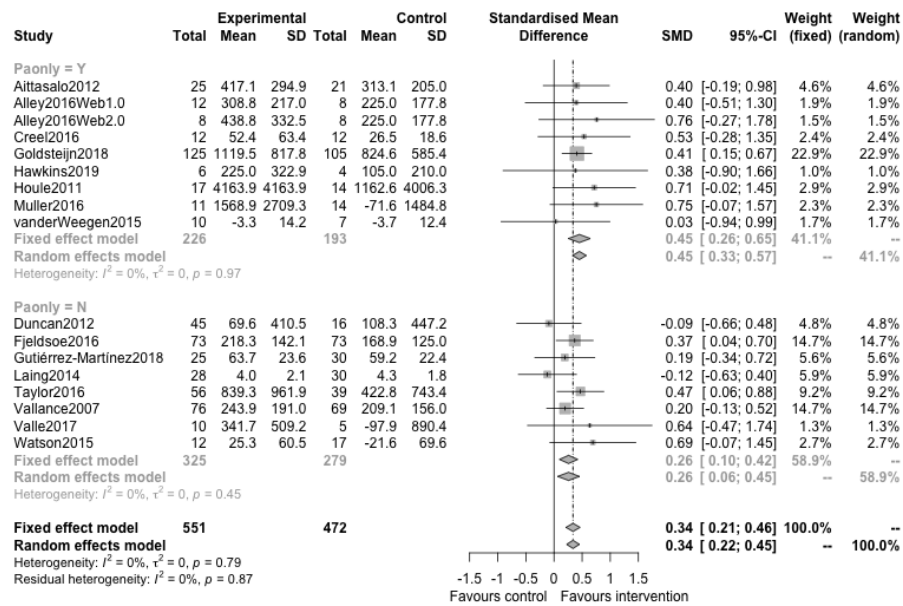

Figure 15: High SES participants in studies split by whether the app had a sole PA focus or not



## High SES subgroup analysis comparing between countries

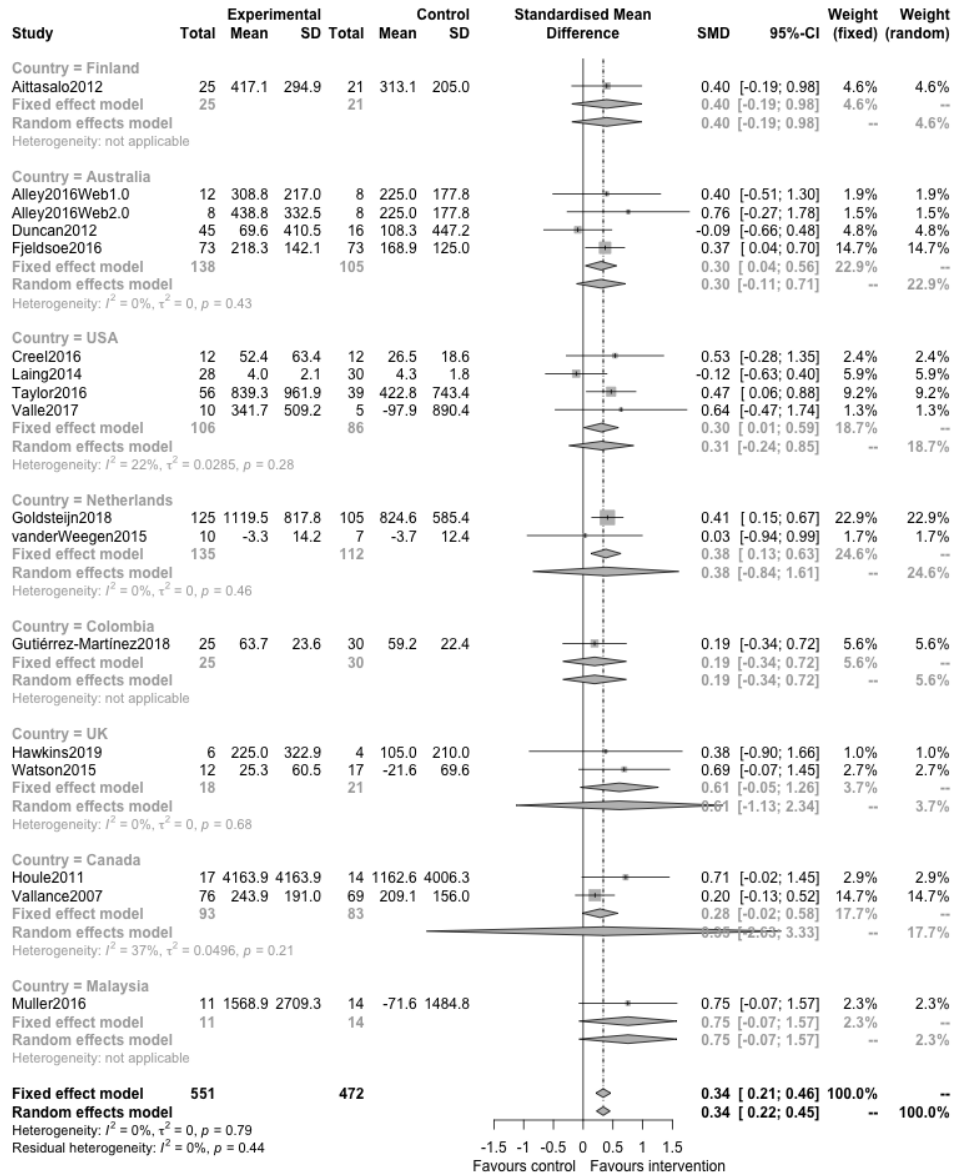

Figure 16: High SES participants in studies split by country

### **High SES subgroup analysis by outcome**

There were too few studies for each outcome type to subgroup meaningfully.

## High SES subgroup analysis by high risk of bias

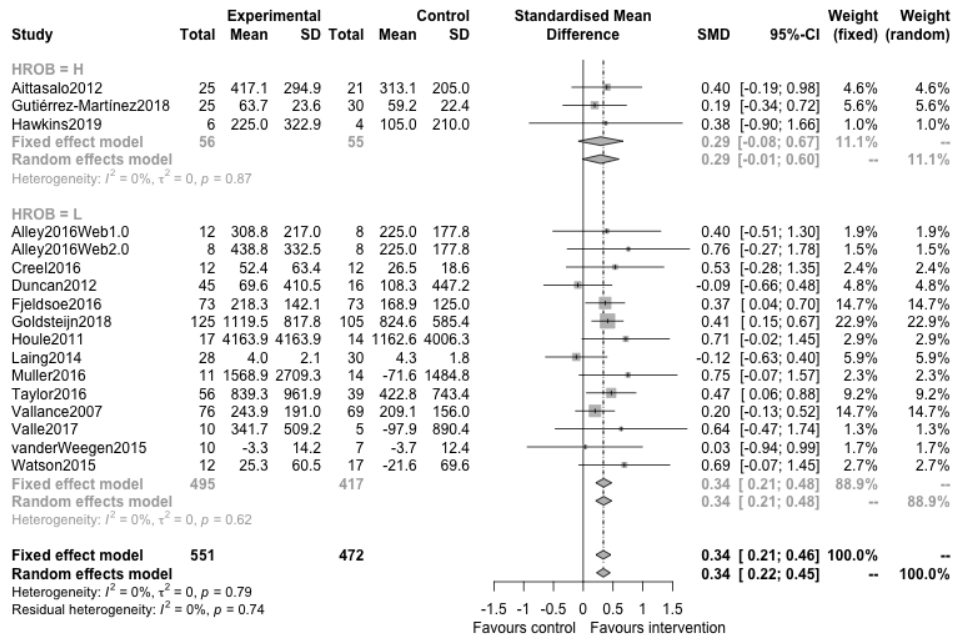

Figure 17: High SES participants in studies split by whether the studies were at high risk of bias or not

## High SES subgroup analysis by age groups

Age group categorisation and reporting did not allow combining into groups for sub-group analysis.

## High SES subgroup analysis by healthy or general population/versus chronic disease populations

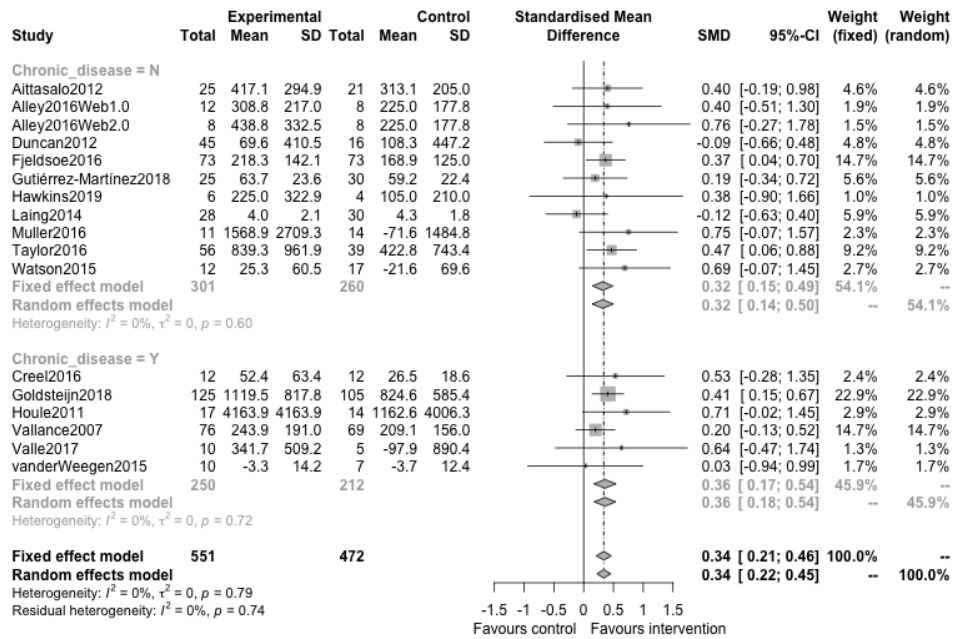

Figure 18: High SES participants in studies split by whether the study populations were suffering from chronic disease or not

High SES subgroup analysis by duration of app exposure (less than 3 months, 3-6, more than 6 months)

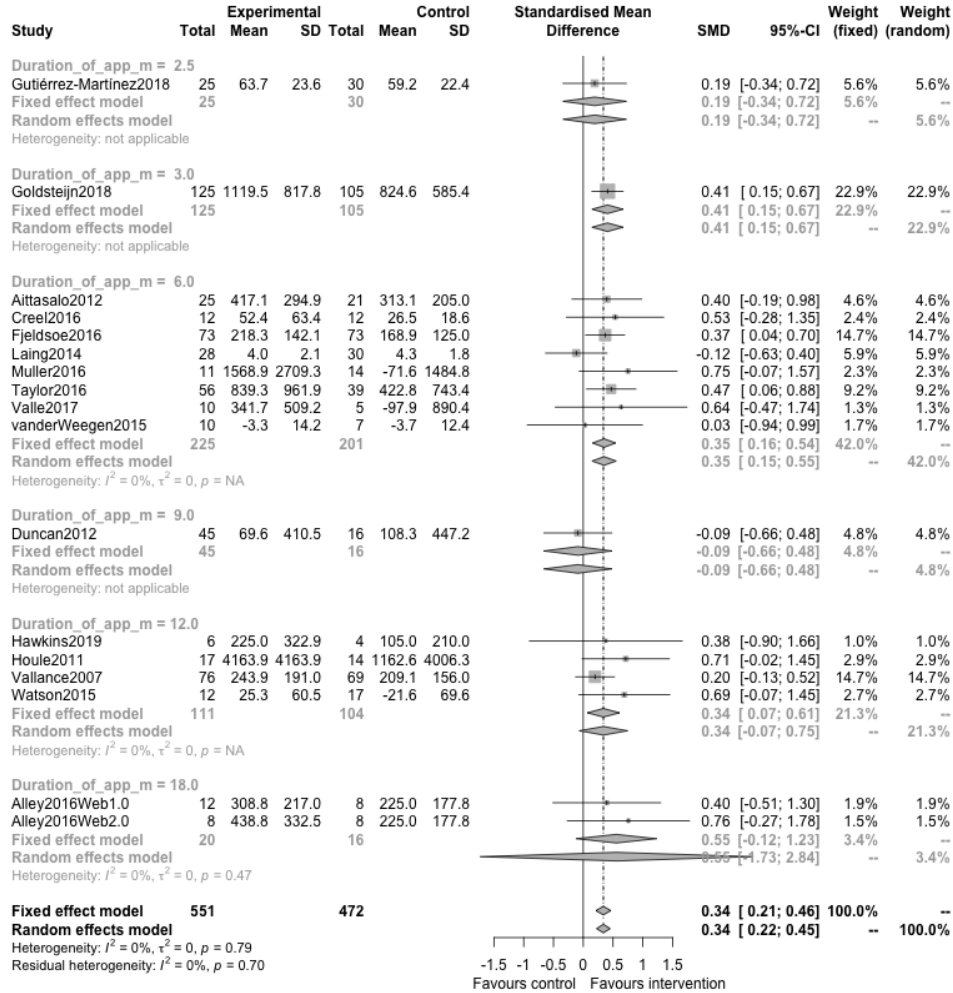

Figure 19: High SES participants in studies split by duration of app exposure

## High SES subgroup analysis by duration of follow-up

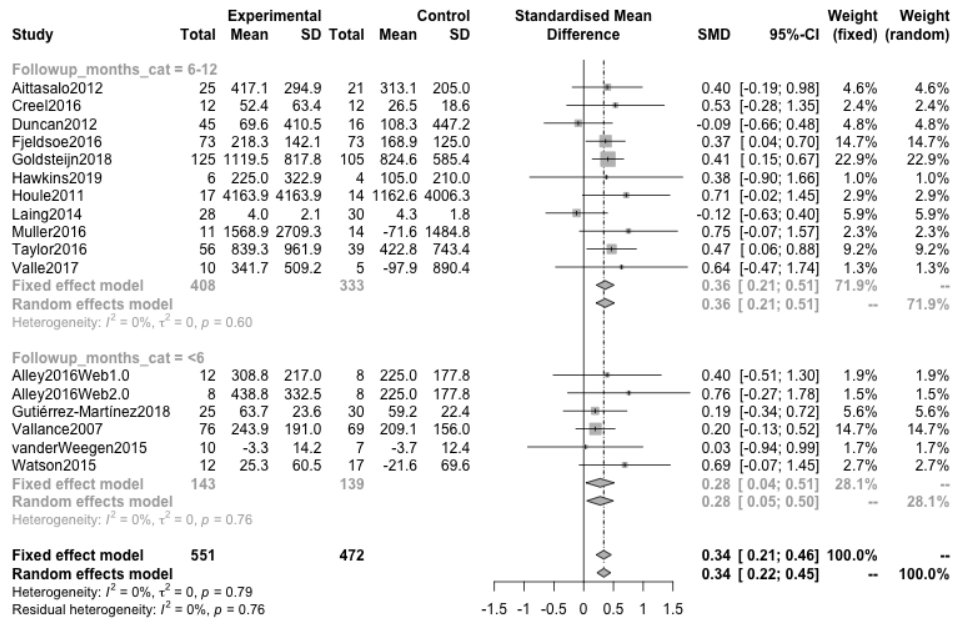

Figure 20: High SES participants in studies split by length of follow-up

## High SES subgroup analysis by pregnancy

Not performed due to lack of studies.

## High SES - Behaviour change subgroups

### High SES- Goals and planning versus not

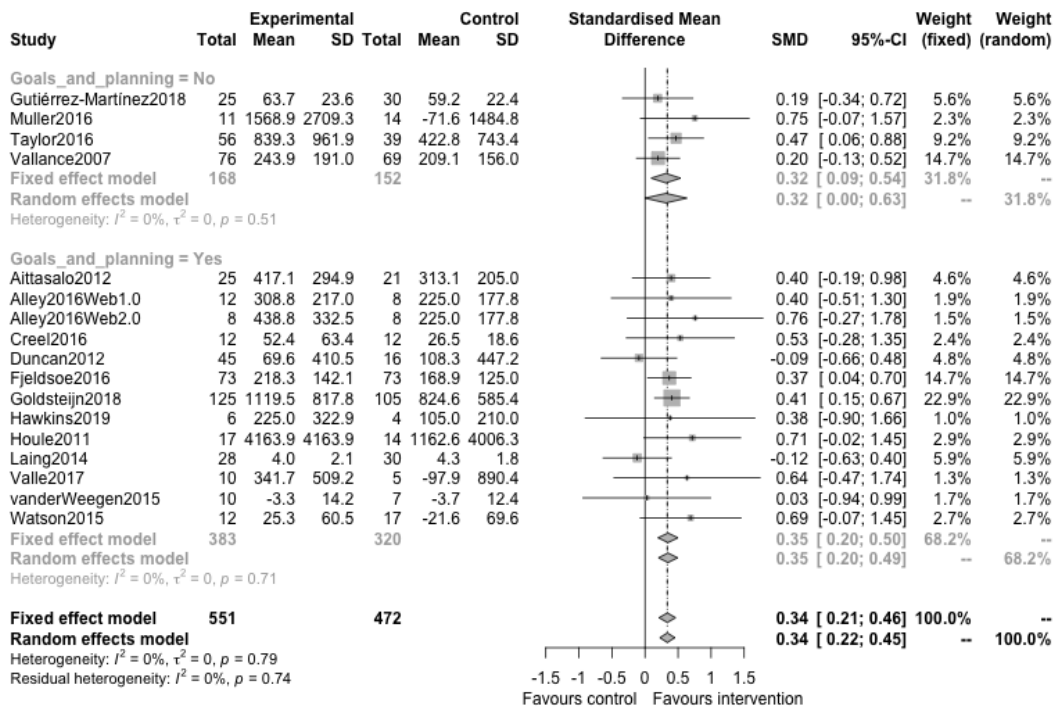

Figure 21: High SES participants in studies split by whether they employed goals and planning as a behaviour change technique or not

## High SES- Feedback and monitoring versus not

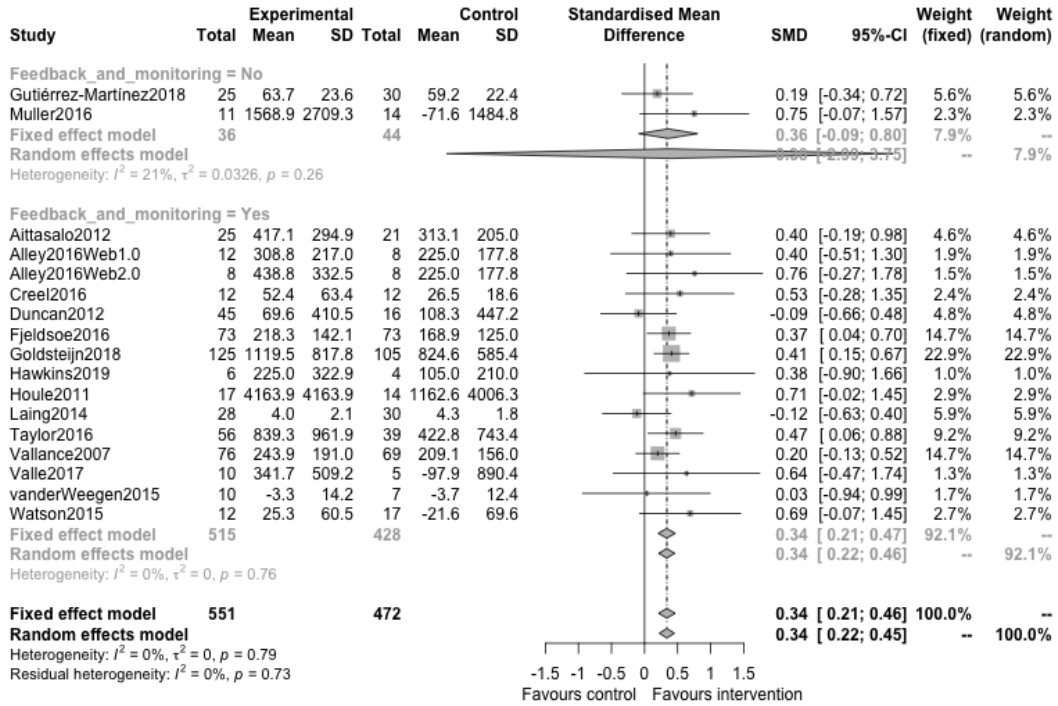

Figure 22: High SES participants in studies split by whether they employed feedback and monitoring as a behaviour change technique or not



## High SES- Sharing knowledge versus not

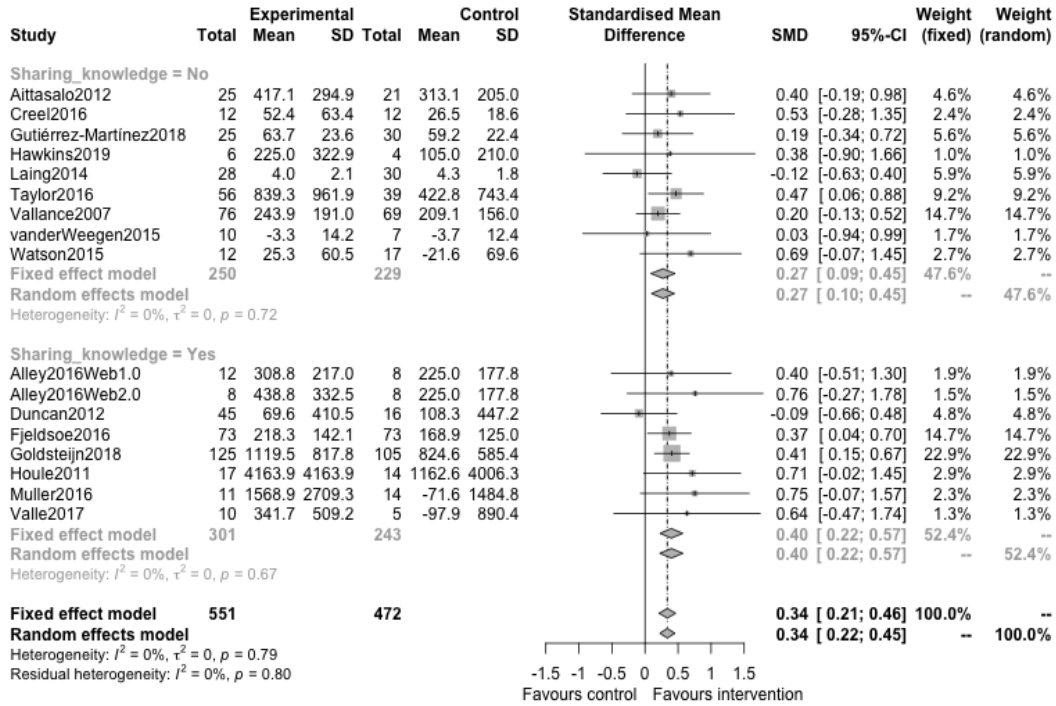

Figure 23: High SES participants in studies split by whether they employed sharing knowledge as a behaviour change technique or not

## High SES- Natural consequences versus not

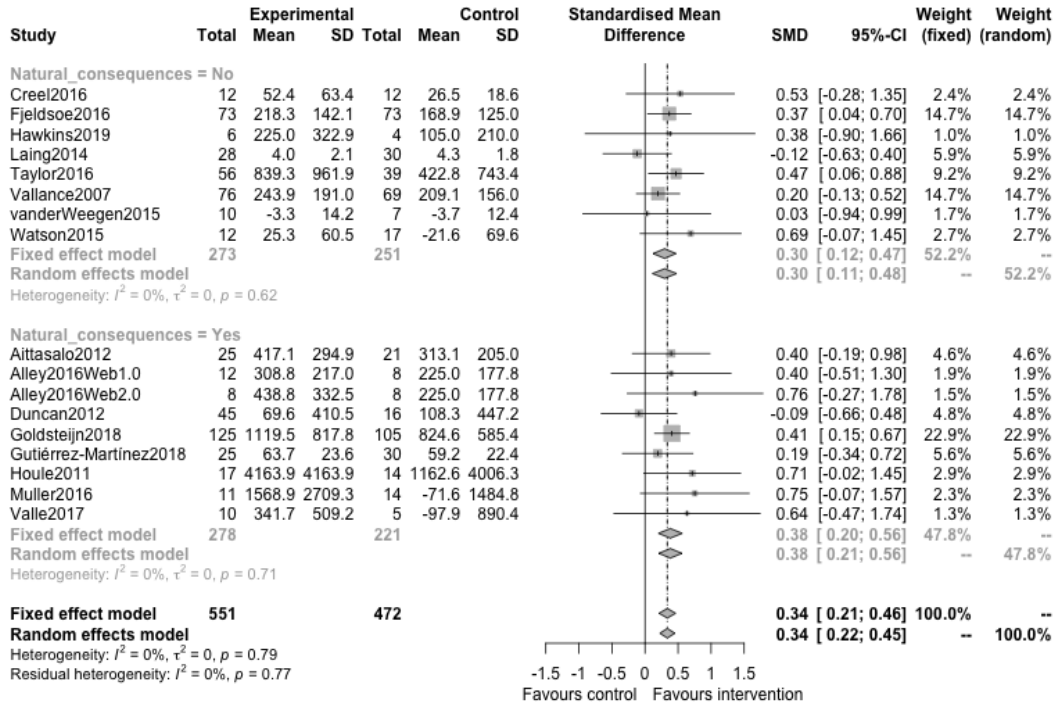

Figure 24: High SES participants in studies split by whether they employed natural consequences as a behaviour change technique or not

# High SES- Comparison of behaviour versus not

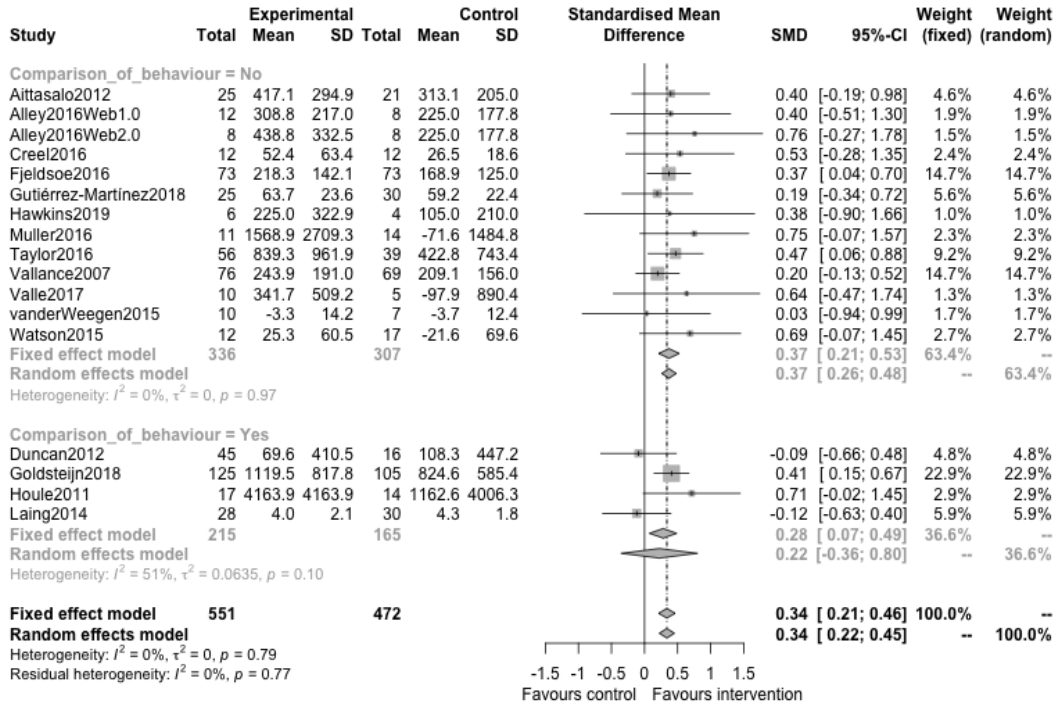

Figure 25: High SES participants in studies split by whether they employed comparison of behaviour as a behaviour change technique or not

# High SES- Reward and threat versus not

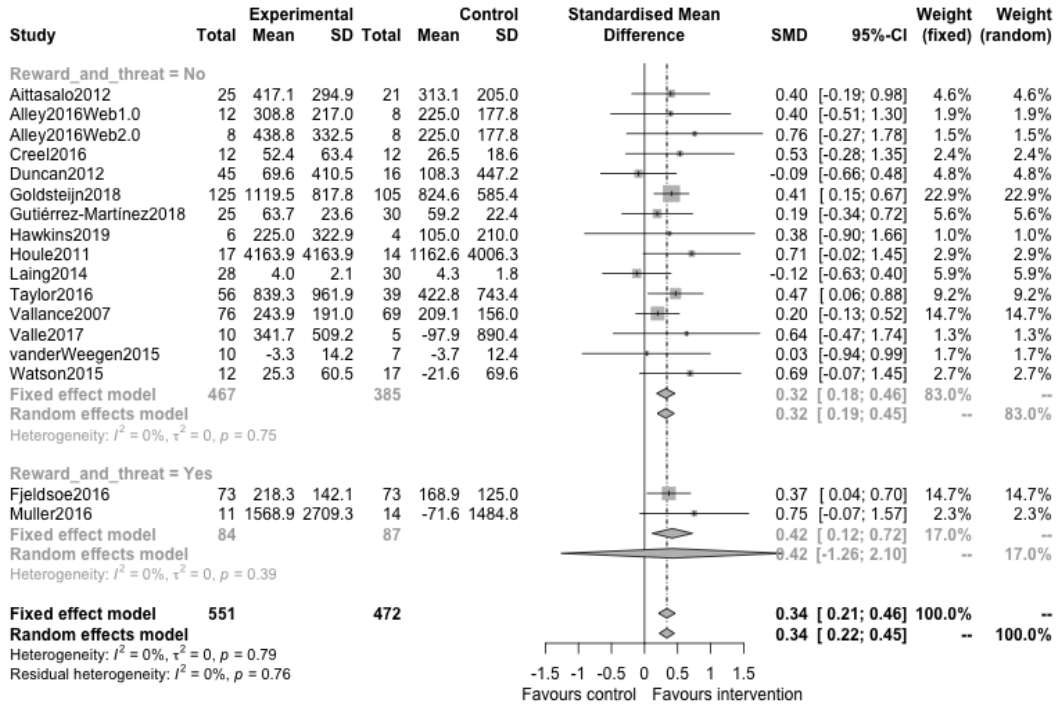

Figure 26: High SES participants in studies split by whether they employed reward and threat as a behaviour change technique or not

# High SES- Antecedents versus not

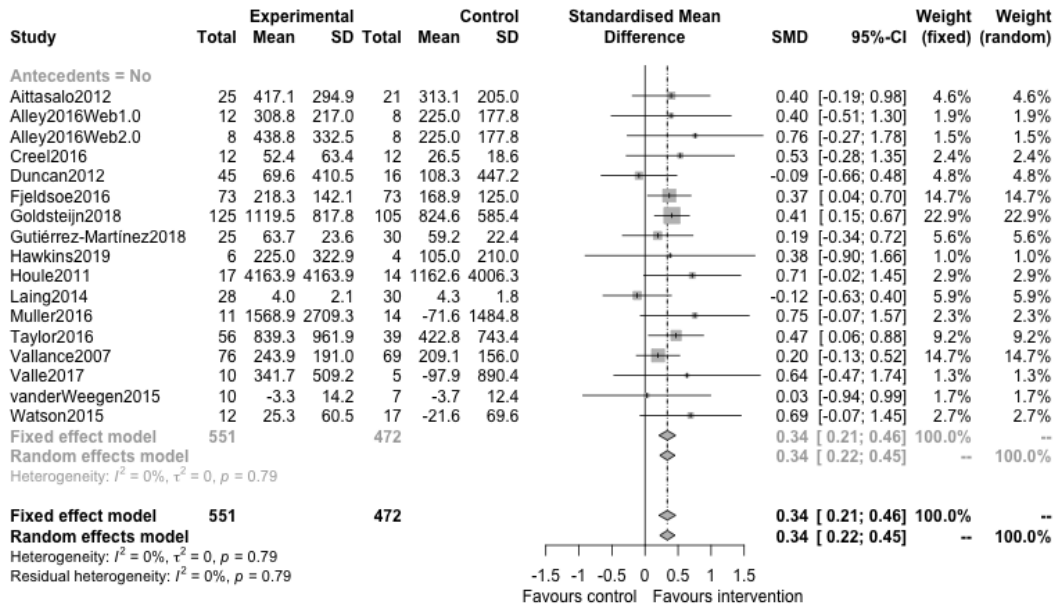

Figure 27: High SES participants in studies split by whether they employed antecedents as a behaviour change technique or not

## Appendix D

### Exploration of publication bias in studies of low SES participants

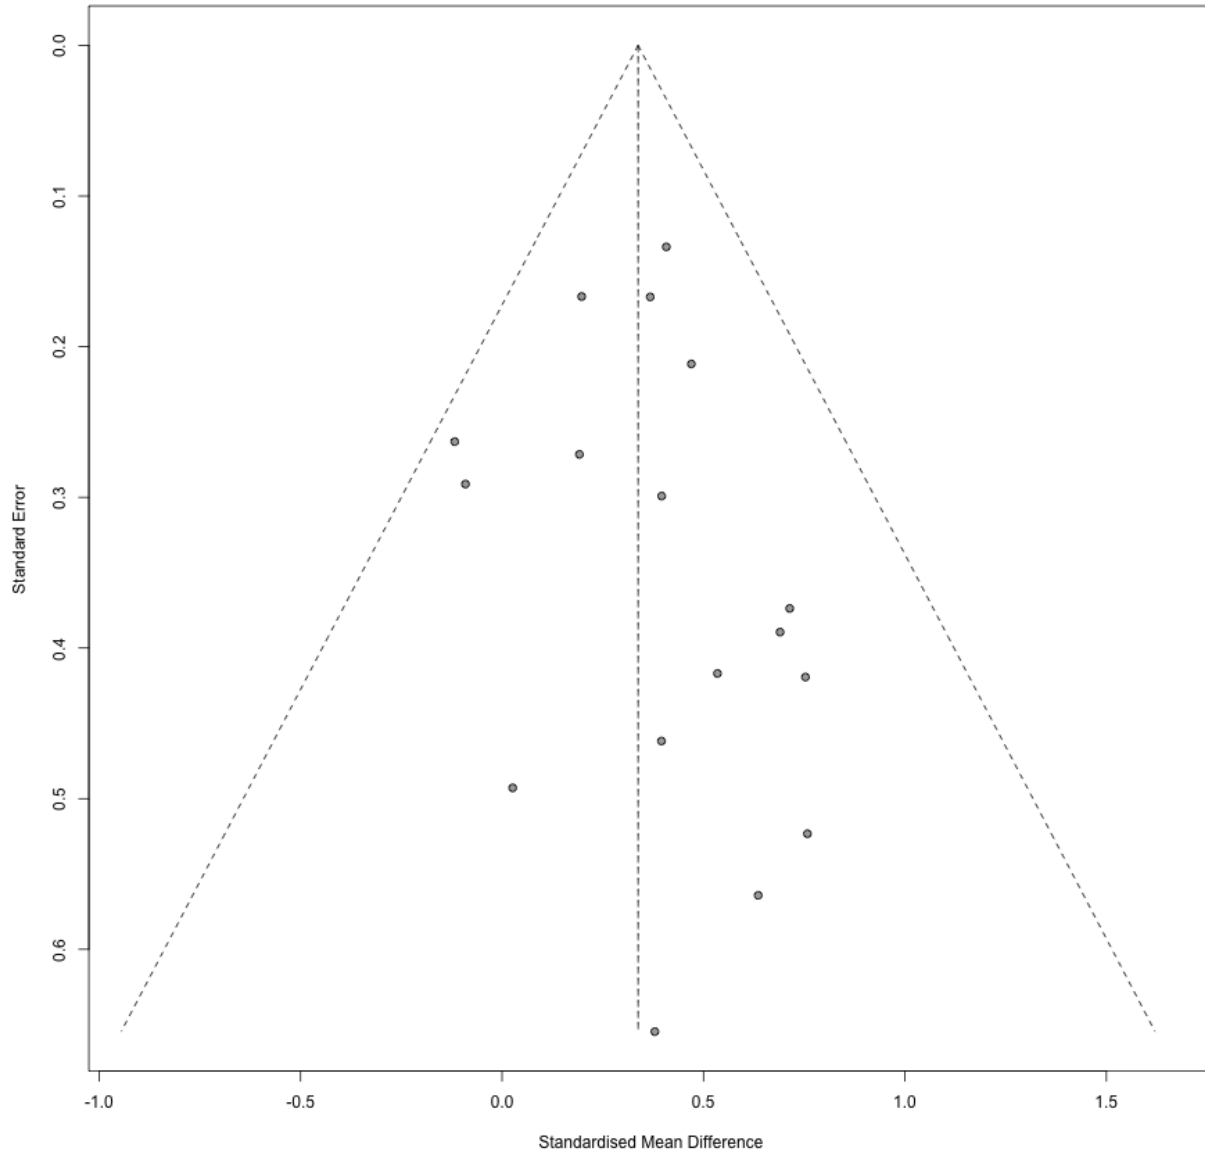

Figure 28: Funnel plot for low SES studies

There is no evidence of publication case ( $p$ -value = 0.86).

# Appendix E

## Post-hoc exploration of difference between objective and self-report physical activity

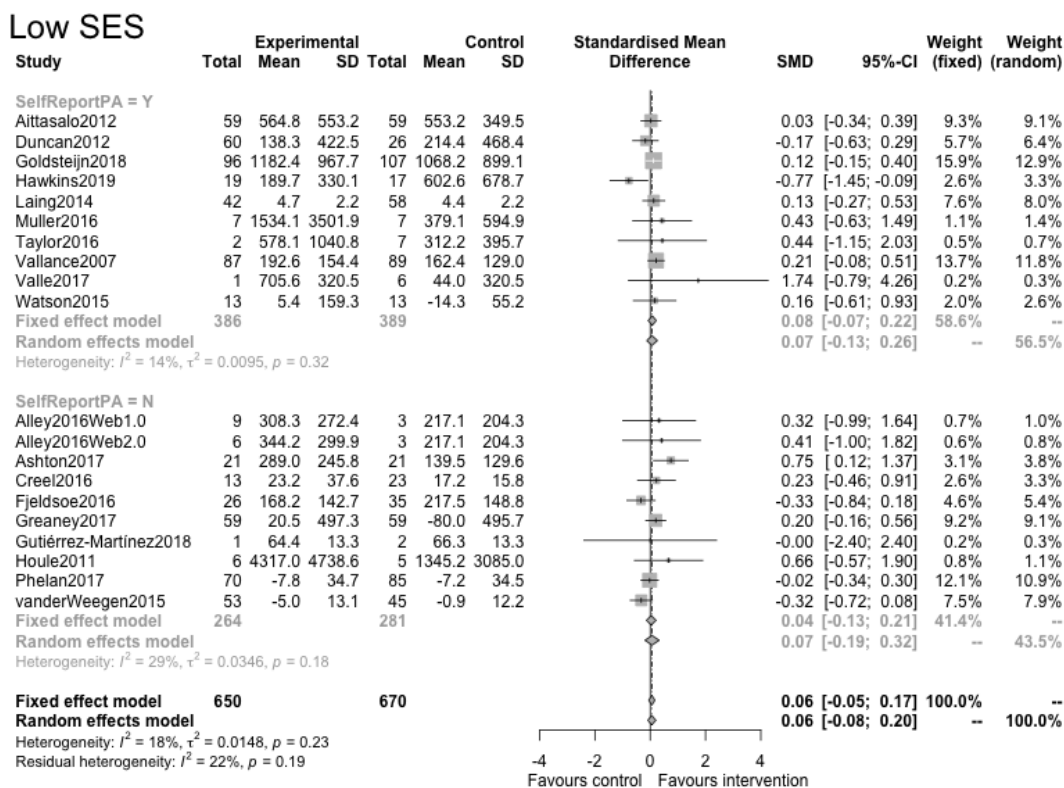

Figure 29: Post-hoc sensitivity analysis exploring differences by self-report versus objectively measured physical activity in low SES groups

## High SES

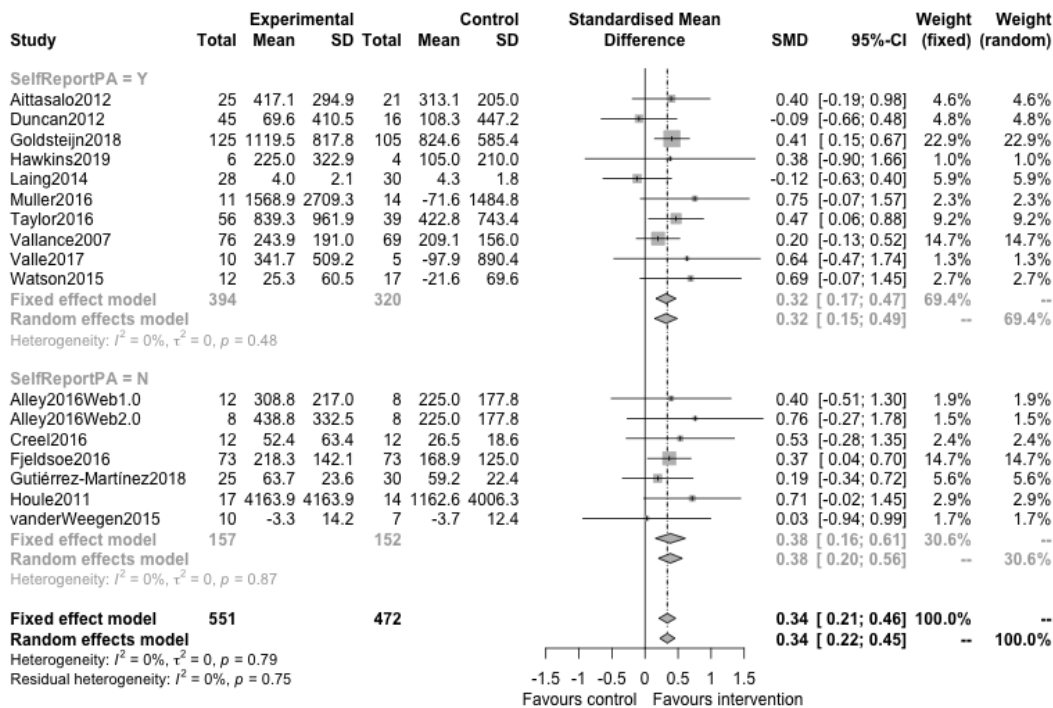

Figure 30: Post-hoc sensitivity analysis exploring differences by self-report versus objectively measured physical activity in high SES groups



Post-hoc exploration of active versus inactive control

Low SES

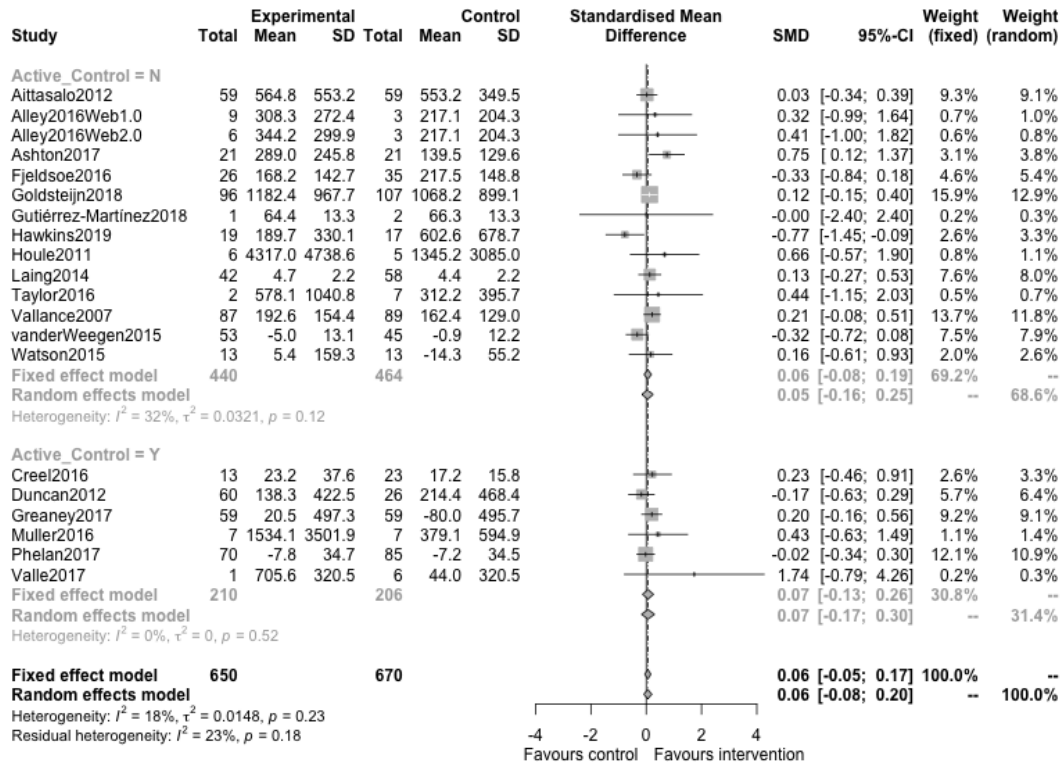

Figure 31: Post-hoc sensitivity analysis exploring differences by active versus inactive controls in low SES groups

## High SES

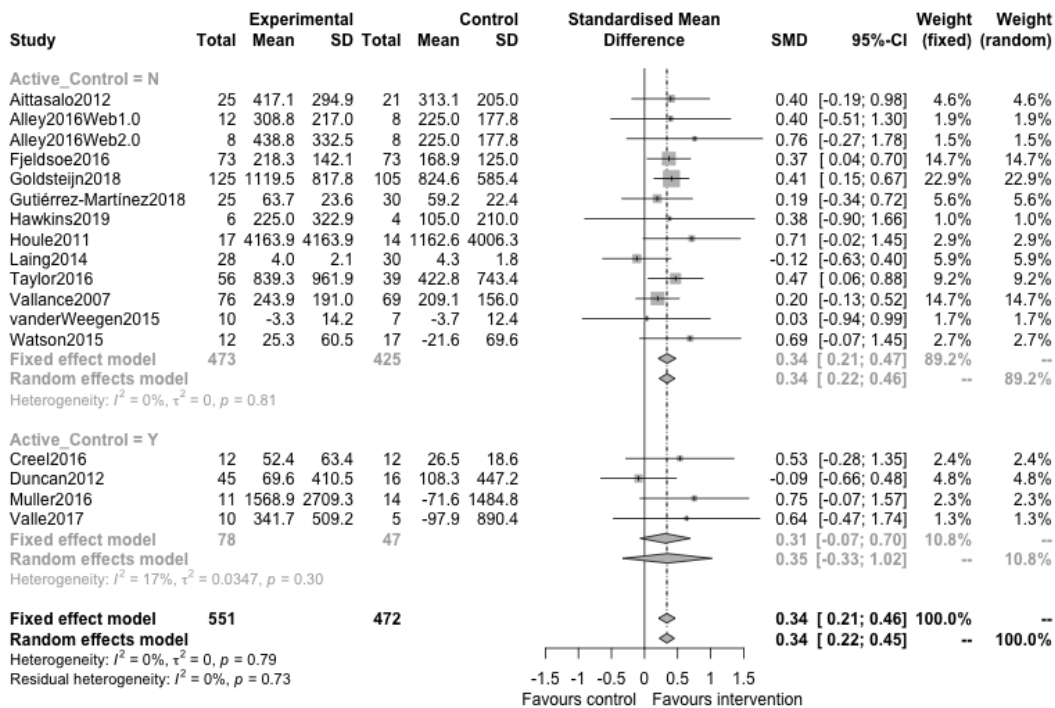

Figure 32: Post-hoc sensitivity analysis exploring differences by active versus inactive controls in high SES groups
